# Supplementary material for: Probing the hydrolytic degradation of UF4 in humid air
Source: Royal Society of Chemistry journal article supplement (doi:10.1039/d2dt00196a), 2022-01-01
Supplement: d2dt00196a1.pdf [file d2dt00196a1.pdf]

# Electronic Supporting Information

## Probing the hydrolytic degradation of UF<sub>4</sub> in humid air

*Bryan J. Foley,<sup>a</sup> Jonathan H. Christian,<sup>a\*</sup> Christopher A. Klug,<sup>b‡</sup> Eliel Villa-Aleman,<sup>a</sup> Matthew Wellons,<sup>a</sup> Michael DeVore II,<sup>a</sup> Nicholas Groden,<sup>a</sup> Jason Darwin<sup>a</sup>*

<sup>a</sup> Savannah River National Laboratory, Aiken, SC 29803

<sup>b</sup> Naval Research Laboratory, Washington, D.C. 20375

\* [Jonathan.Christian@srnl.doe.gov](mailto:Jonathan.Christian@srnl.doe.gov)

‡ [Christopher.klug@nrl.navy.mil](mailto:Christopher.klug@nrl.navy.mil)

## List of SI Figures

|                                                                                                                                                                                                                                                                                                                                                                                                                                                                                           |    |
|-------------------------------------------------------------------------------------------------------------------------------------------------------------------------------------------------------------------------------------------------------------------------------------------------------------------------------------------------------------------------------------------------------------------------------------------------------------------------------------------|----|
| <b>Figure S1.</b> Raman spectrum of commercially-purchased UF <sub>4</sub> taken upon receipt.....                                                                                                                                                                                                                                                                                                                                                                                        | 3  |
| <b>Figure S2.</b> TOP: pXRD pattern of commercially purchased UF <sub>4</sub> obtained upon receipt (Note: The intense reflections at 62° is an errant reflection from the sample holder). Bottom: Database powder diffraction file for anhydrous UF <sub>4</sub> . <sup>1</sup> .....                                                                                                                                                                                                    | 4  |
| <b>Figure S3.</b> SEM image of commercially purchased UF <sub>4</sub> obtained upon receipt. ....                                                                                                                                                                                                                                                                                                                                                                                         | 5  |
| <b>Figure S4.</b> Bottom: Database powder diffraction file for anhydrous UF <sub>4</sub> . <sup>1</sup> Middle: pXRD pattern of commercially purchased UF <sub>4</sub> after 1 day of exposure to 85% RH (Note: The intense reflections at 62° is an errant reflection from the sample holder). Top: pXRD pattern of commercially purchased UF <sub>4</sub> after 7 days of exposure to 85% RH (Note: The intense reflections at 62° is an errant reflection from the sample holder)..... | 6  |
| <b>Figure S5.</b> Bottom: Database powder diffraction file for anhydrous UF <sub>4</sub> . <sup>1</sup> Middle: pXRD pattern of commercially purchased UF <sub>4</sub> after 1 day of exposure to 50% RH (Note: The intense reflections at 62° is an errant reflection from the sample holder). Top: pXRD pattern of commercially purchased UF <sub>4</sub> after 7 days of exposure to 50% RH (Note: The intense reflections at 62° is an errant reflection from the sample holder)..... | 7  |
| <b>Figure S6.</b> <sup>19</sup> F NMR spectra of UF <sub>4</sub> before (black trace) and after (red trace) exposure to air at 85% RH. These spectra resulted from the sum of 11 sub-spectra using an automated acquisition method a) with a wait time of 4 ms between scans; b) with a wait time of 4 s between scans. The total number of scans for each sub-spectrum was a) 2048 and b) 1024.....                                                                                      | 8  |
| <b>Figure S7.</b> Left: Custom three-piece glassware for constant humidity experiments. Right: incorporation of custom glassware into custom NMR probe head.....                                                                                                                                                                                                                                                                                                                          | 9  |
| <b>Figure S8.</b> Left: Representative UF <sub>4</sub> sample after exposure to air at 85% RH for 13 days and corresponding EDS spectrum. Right: Representative UF <sub>4</sub> sample after exposure to air at 50% RH for 11 days.....                                                                                                                                                                                                                                                   | 10 |

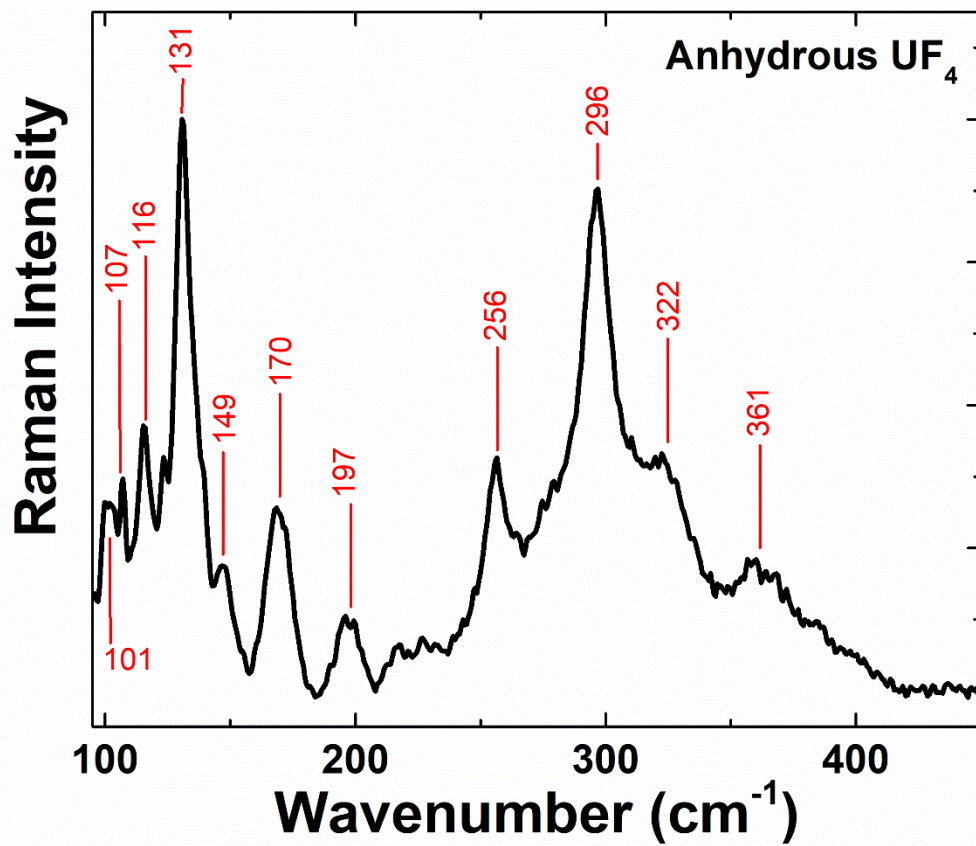

Figure S1. Raman spectrum of commercially-purchased UF<sub>4</sub> taken upon receipt.

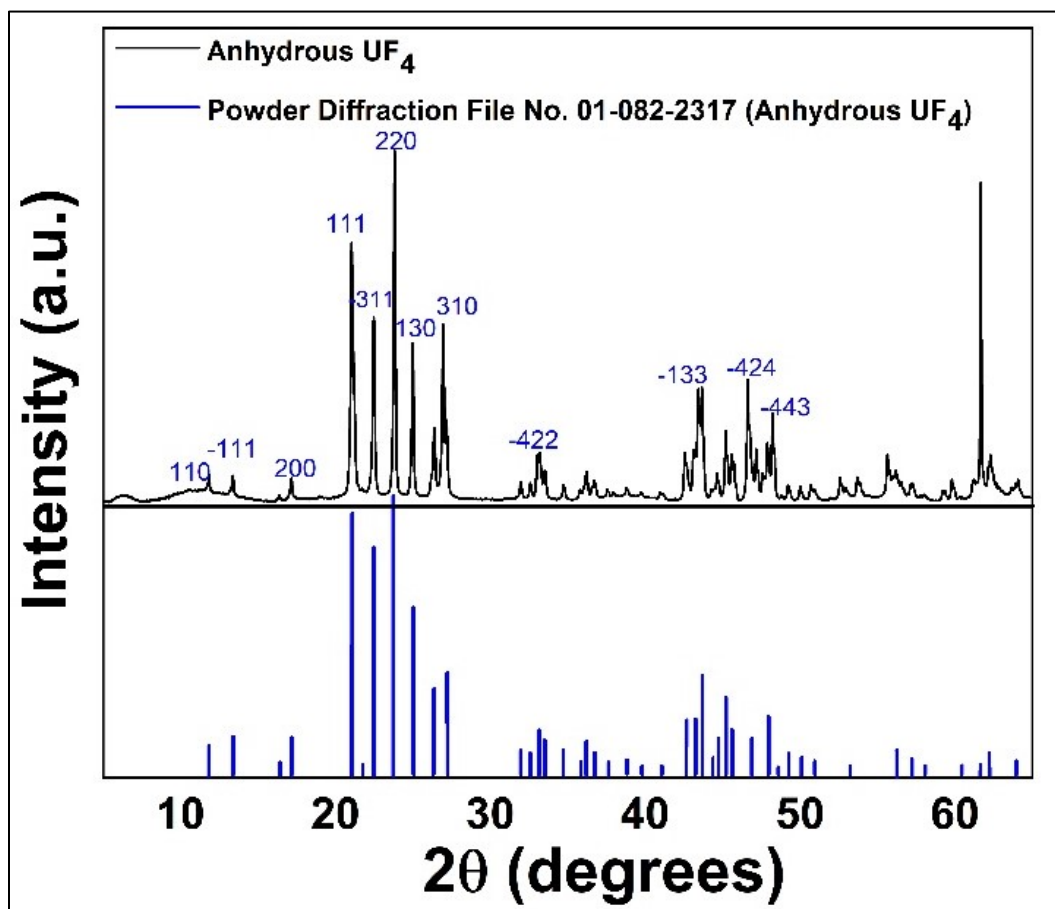

**Figure S2.** TOP: pXRD pattern of commercially purchased UF<sub>4</sub> obtained upon receipt (Note: The intense reflection at ~62° is an errant reflection from the sample holder). Miller Indices labels are shown above several of the more intense diffraction lines. Bottom: Database powder diffraction file for anhydrous UF<sub>4</sub>.<sup>1</sup>

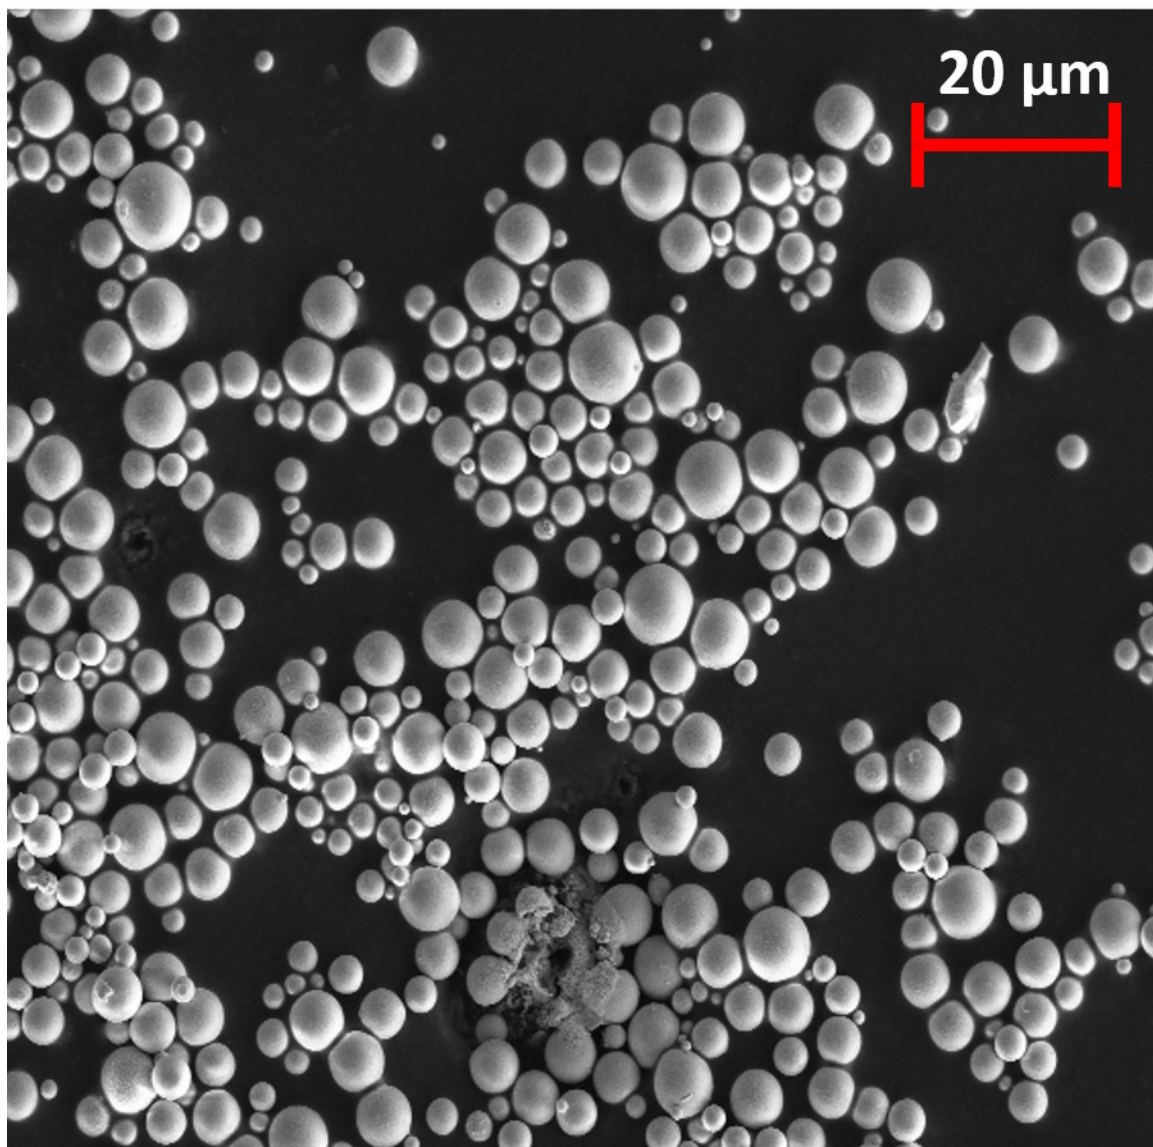

**Figure S3.** SEM image of commercially purchased  $\text{UF}_4$  obtained upon receipt.

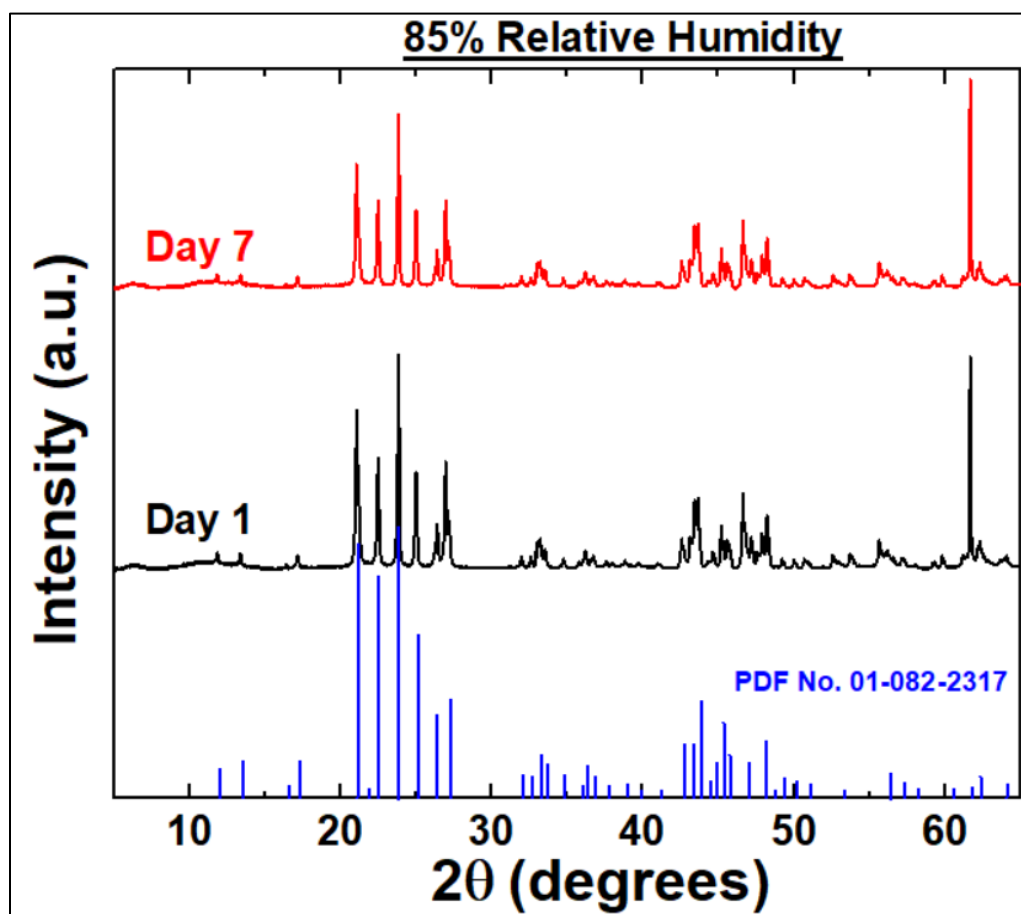

**Figure S4.** Bottom: Database powder diffraction file for anhydrous UF<sub>4</sub>.<sup>1</sup> Middle: pXRD pattern of commercially purchased UF<sub>4</sub> after 1 day of exposure to 85% RH (Note: The intense reflections at 62° is an errant reflection from the sample holder). Top: pXRD pattern of commercially purchased UF<sub>4</sub> after 7 days of exposure to 85% RH (Note: The intense reflections at 62° is an errant reflection from the sample holder).

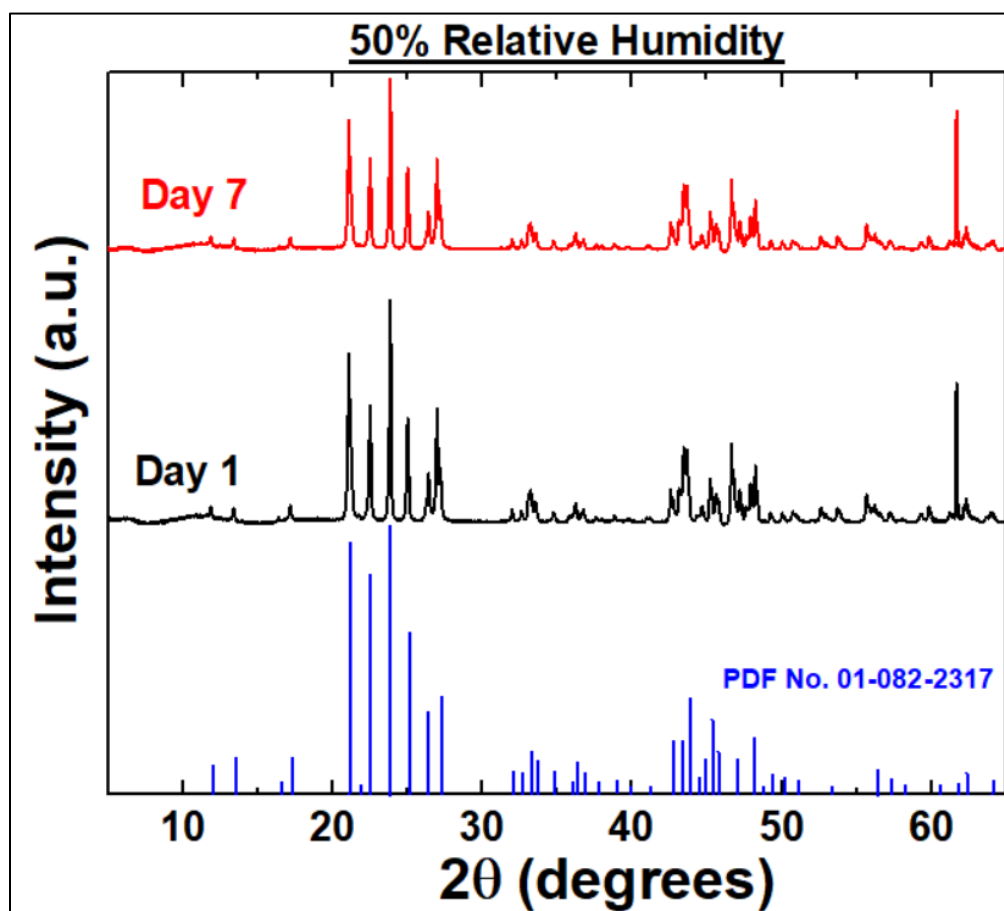

**Figure S5.** Bottom: Database powder diffraction file for anhydrous  $\text{UF}_4$ .<sup>1</sup> Middle: pXRD pattern of commercially purchased  $\text{UF}_4$  after 1 day of exposure to 50% RH (Note: The intense reflections at  $62^\circ$  is an errant reflection from the sample holder). Top: pXRD pattern of commercially purchased  $\text{UF}_4$  after 7 days of exposure to 50% RH (Note: The intense reflections at  $62^\circ$  is an errant reflection from the sample holder).

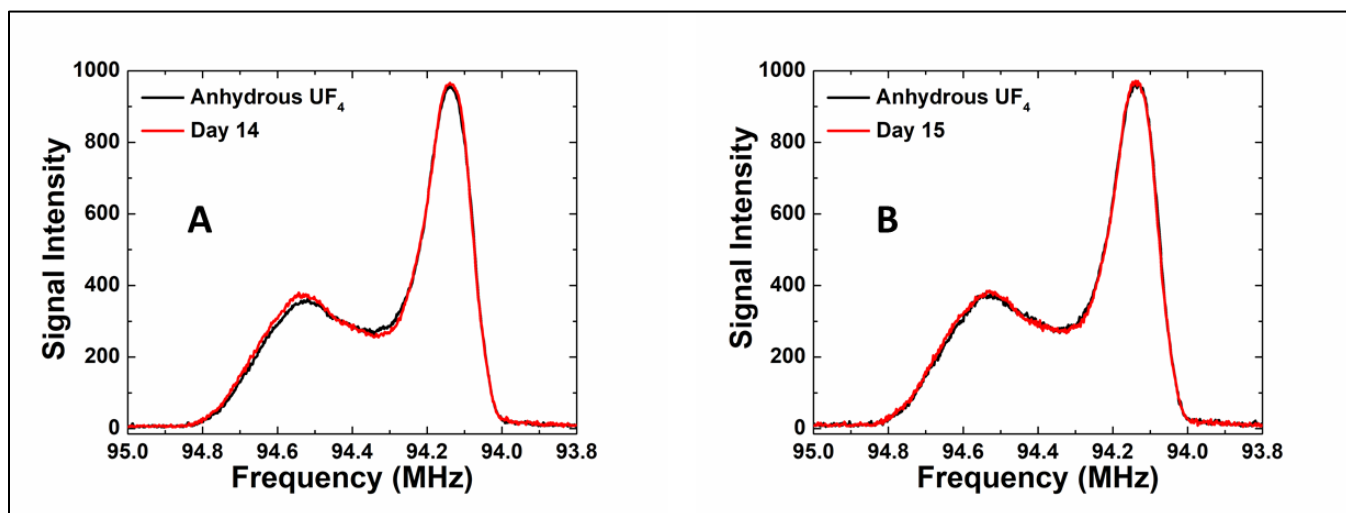

**Figure S6.**  $^{19}\text{F}$  NMR spectra of  $\text{UF}_4$  before (black trace) and after (red trace) exposure to air at 85% RH. These spectra resulted from the sum of 11 sub-spectra using an automated acquisition method a) with a wait time of 4 ms between scans; b) with a wait time of 4 s between scans. The total number of scans for each sub-spectrum was a) 2048 and b) 1024.



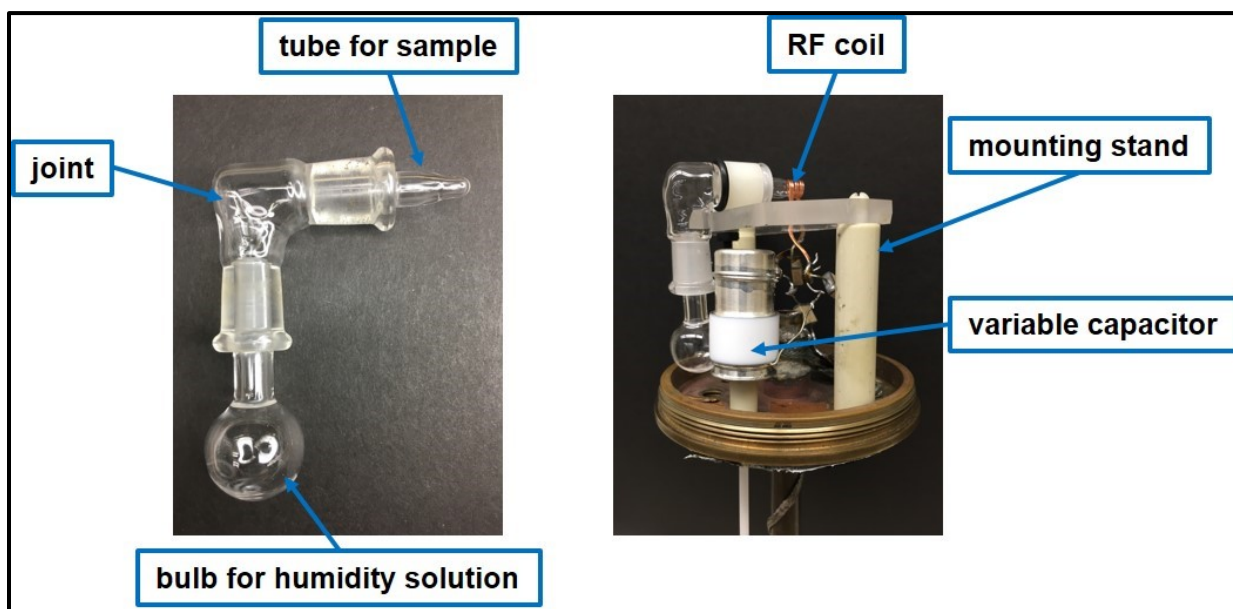

**Figure S7.** Left: Custom three-piece glassware for constant humidity experiments. Right: incorporation of custom glassware into custom NMR probe head.

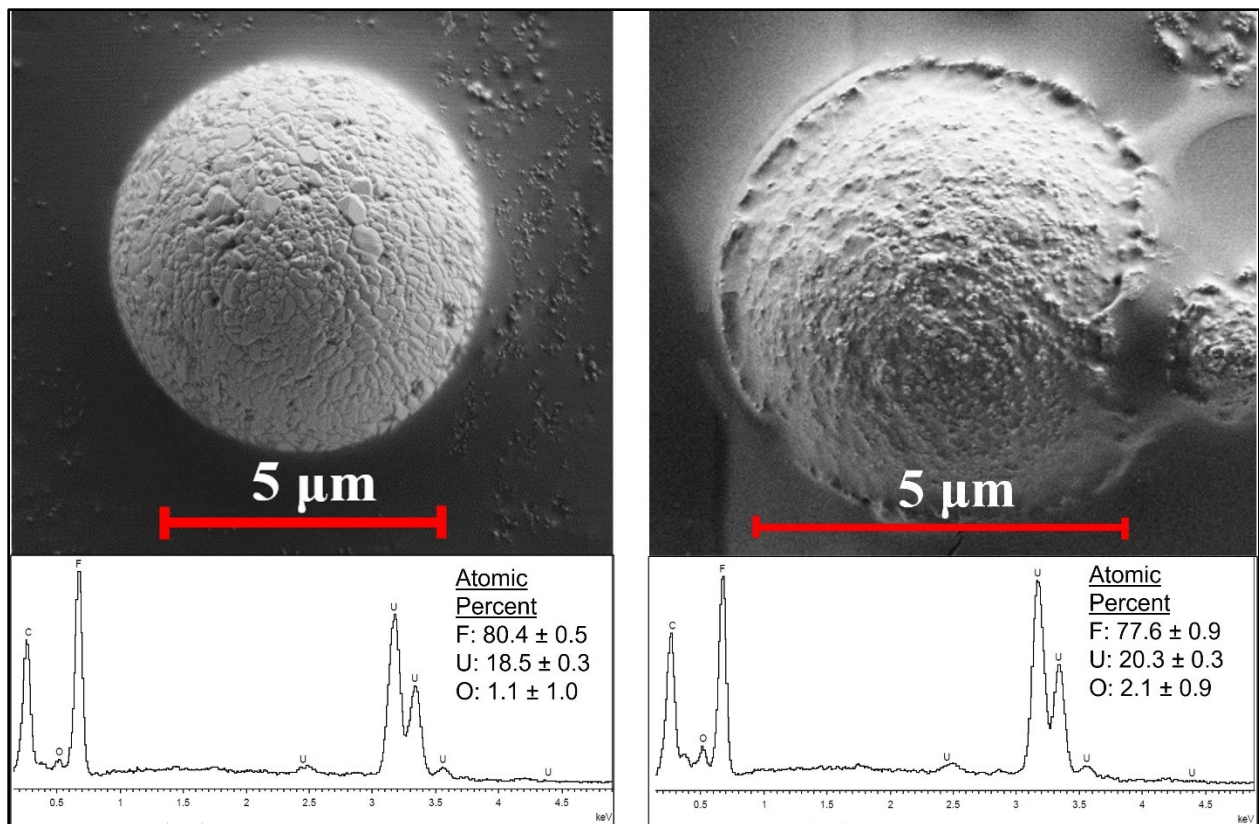

**Figure S8.** Left: Representative  $\text{UF}_4$  sample after exposure to air at 85% RH for 13 days and corresponding EDS spectrum. Right: Representative  $\text{UF}_4$  sample after exposure to air at 50% RH for 11 days.

**Table S1.** Previously published Raman resonance bands for UF<sub>4</sub> and several uranium-bearing compounds.

| Formula                                           | Laser (nm) | Raman shift bands (cm <sup>-1</sup> )                                                                      | SI Reference |
|---------------------------------------------------|------------|------------------------------------------------------------------------------------------------------------|--------------|
| Anhydrous UF <sub>4</sub>                         | 785        | 59.4, 66.8, 78.9, 91.0, 101.3, 107.2, 115.9, 131.4, 148.5, 170.4, 197.3, 255.8, 296.1, 322.4, 360.8, 603.6 | 2            |
| UF <sub>4</sub> (H <sub>2</sub> O) <sub>2.5</sub> | 785        | 82, 95, 106, 118, 156, 185, 235, 257, 282, 320, 333, 340, 364, 427, 3283, 3390, 3481, 3535                 | 3            |
| Hydrated UO <sub>2</sub> F <sub>2</sub>           | 514        | 867, 174                                                                                                   | 4            |
| Anhydrous UO <sub>2</sub> F <sub>2</sub>          | 514        | 915, 442, 180                                                                                              | 4            |
| UO <sub>2</sub>                                   | 514        | 445                                                                                                        | 5            |
| UO <sub>2</sub>                                   | 514        | 448, 630, 1104, 1152                                                                                       | 6            |
| UO <sub>2</sub>                                   | 514        | 445                                                                                                        | 7            |
| UO <sub>2</sub>                                   | 514        | 232, 445, 1151                                                                                             | 8            |
| UO <sub>2</sub>                                   | 488        | 450, 585, 1595                                                                                             | 9            |
| UO <sub>2</sub>                                   | 488        | 448, 585, 920, 1150                                                                                        | 9            |
| UO <sub>2</sub>                                   | 785        | 445, 583, 640, 1160, 1360                                                                                  | 9            |
| U <sub>4</sub> O <sub>9</sub>                     | ---        | 210, 465                                                                                                   | 10           |
| U <sub>3</sub> O <sub>7</sub>                     | ---        | 210, 465                                                                                                   | 10           |
| U <sub>3</sub> O <sub>7</sub>                     | ---        | 410, 445, 500                                                                                              | 7            |
| U <sub>3</sub> O <sub>8</sub>                     | 514        | 343, 351, 412, 483, 738, 811                                                                               | 5            |
| U <sub>3</sub> O <sub>8</sub>                     | 514        | 236, 342, 408, 480, 752, 798                                                                               | 7            |
| U <sub>3</sub> O <sub>8</sub>                     | 488        | 235, 340, 405, 480, 640, 745, 800, 885                                                                     | 9            |
| U <sub>3</sub> O <sub>8</sub>                     | 514        | 236, 342, 408, 480, 638, 752, 798, 888                                                                     | 11           |
| γ-UO <sub>3</sub>                                 | 514        | 768, 846                                                                                                   | 5            |
| UO <sub>2</sub> (OH) <sub>2</sub>                 | ---        | 838, 855                                                                                                   | 12           |
| Schoepite                                         | 1064       | 843, 845                                                                                                   | 13           |

## SI References

1. PDF 4 Database, International Centre for Diffraction Data, Newtown Square, PA, 2015, Card No #01-082-2317.
2. E. Villa-Aleman and M. S. Wellons, *Journal of Raman Spectroscopy*, 2016, **47**, 865-870.
3. J. H. Christian, C. A. Klug, M. DeVore, E. Villa-Aleman, B. J. Foley, N. Groden, A. T. Baldwin and M. S. Wellons, *Dalton Transactions*, 2021, **50**, 2462-2471.
4. D. P. Armstrong, R. J. Jarabek and W. H. Fletcher, *Applied Spectroscopy*, 1989, **43**, 461-468.
5. M. L. Palacios and S. H. Taylor, *Applied Spectroscopy*, 2000, **54**, 1372-1378.
6. P. R. Graves, *Applied Spectroscopy*, 1990, **44**, 1665-1667.
7. G. C. Allen, I. S. Butler and T. Nguyen Anh, *Journal of Nuclear Materials*, 1987, **144**, 17-19.
8. D. Manara and B. Renker, *Journal of Nuclear Materials*, 2003, **321**, 233-237.
9. S. D. Senanayake, R. Rousseau, D. Colegrave and H. Idriss, *Journal of Nuclear Materials*, 2005, **342**, 179-187.
10. W. Siekhaus, Composition of uranium oxide surface layers analyzed by μ-Raman spectroscopy, *MRS 2003 Fall Meeting*, Boston, MA, USA, 1-5 December, 2005.
11. I. S. Butler, G. C. Allen and N. A. Tuan, *Applied Spectroscopy*, 1988, **42**, 901-902.
12. E. A. Stefaniak, A. Worobiec, S. Potgieter-Vermaak, A. Alsecc, S. Török and R. Van Grieken, *Spectrochimica Acta Part B: Atomic Spectroscopy*, 2006, **61**, 824-830.
13. M. Amme, B. Renker, B. Schmid, M. P. Feth, H. Bertagnolli and W. Döbelin, *Journal of Nuclear Materials*, 2002, **306**, 202-212.
